# Supplementary material for: Influence of Fermented Mulberry Leaves as an Alternative Animal Feed Source on Product Performance and Gut Microbiome in Pigs
Source: MDPI journal article supplement (doi:10.3390/fermentation10040215), 2024-04-15
Supplement: s1 [file s1]

**Table S1**

Composition and nutrient levels of basal diets (% , as air-dry basis)

| Ingredients               | CON    | FML    | Nutrient levels <sup>2</sup> | CON   | FML   |
|---------------------------|--------|--------|------------------------------|-------|-------|
| Corn                      | 69.42  | 65.23  | Digestible<br>energy/(MJ/kg) | 14.21 | 14.49 |
| Soybean meal              | 16.49  | 11.67  | Crude protein                | 15.21 | 15.18 |
| Wheat bran                | 8.00   | 7.30   | Crude fiber                  | 3.21  | 4.59  |
| Soybean oil               | 2.60   | 2.60   | Neutral detergent fiber      | 11.56 | 16.11 |
| L-Lysine                  | 0.38   | 0.41   | Acid detergent fiber         | 3.78  | 5.02  |
| DL-Methionine             | 0.05   | 0.12   | Ether extract                | 1.73  | 2.33  |
| L-Threonine               | 0.06   | 0.08   | Ash                          | 4.17  | 4.20  |
| L-Tryptophan              | 0.01   | 0.05   | Calcium                      | 0.61  | 0.68  |
| CaHPO <sub>4</sub>        | 0.91   | 0.93   | Total phosphorus             | 0.50  | 0.52  |
| Limestone                 | 0.78   | 0.31   | Available phosphorus         | 0.23  | 0.22  |
| NaCl                      | 0.30   | 0.30   | Lysine                       | 0.98  | 0.99  |
| Fermented mulberry leaves |        | 10.00  | Methionine + Cystine         | 0.55  | 0.55  |
| Premix <sup>1</sup>       | 1.00   | 1.00   | Threonine                    | 0.59  | 0.59  |
| Total                     | 100.00 | 100.00 | Tryptophan                   | 0.17  | 0.18  |

CON, basal diet; FML, basal diet +10% fermented mulberry leaves;

1 Premix provided the following per kg of diets: VA 6 500 IU, VD<sub>3</sub> 2 000 IU, VE 150 mg, VK<sub>3</sub> 3 mg, VB<sub>12</sub> 0.03 mg, VB<sub>1</sub> 3 mg, VB<sub>2</sub> 6 mg, VB<sub>6</sub> 5 mg, nicotinic acid 45 mg, D-pantothenic acid 9 mg, folic acid 1 mg, biotin 0.3 mg, Fe 72 mg, Cu 10 mg, Mn 42

mg, Zn 72 mg, I 0.42 mg, Se 0.2 mg, Mg 34 mg.

2 Crude protein, crude fiber, neutral detergent fiber, acid detergent fiber, ether extract, and ash are measured values, and the others are calculated values.

**Table S2**

Alapha diversity analysis of unfermented (CON) and fermented mulberry leaves (FML).

| Index    | CON       | FML         |
|----------|-----------|-------------|
| Chao     | 1032±37   | 1537±98**   |
| Richness | 702±32    | 1240±94***  |
| Shannon  | 4.06±0.16 | 4.98±0.15** |
| Simpson  | 0.17±0.03 | 0.11±0.05*  |
| ACE      | 1104±39   | 1580±95**   |

**Table S3**

Effects of fermented mulberry leaves on chemical composition (fresh meat) and antioxidant capacity of *longissimus thoracis* in finishing pigs.

| Items                     | CON         | FML         | <i>P</i> -value |
|---------------------------|-------------|-------------|-----------------|
| Chemical composition      |             |             |                 |
| Dry matter (%)            | 27.47±0.18  | 27.42±0.55  | 0.926           |
| Ether extract (%)         | 3.27±0.36   | 2.94±0.51   | 0.615           |
| Crude protein (%)         | 22.81±0.03  | 23.07±0.22  | 0.299           |
| Inosinic acid (mg/100 g ) | 229.17±6.90 | 231.50±6.41 | 0.903           |
| Antioxidant status        |             |             |                 |
| T-AOC (U/mgprot)          | 2.66±0.65   | 3.00±0.40   | 0.665           |
| MDA (nmol/mgprot)         | 0.01±0.00   | 0.01±0.00   | 0.473           |
| T-SOD (U/mgprot)          | 0.85±0.02   | 0.85±0.05   | 0.914           |
| GSH-Px (U/mgprot)         | 12.65±1.91  | 10.86±1.44  | 0.473           |

CON, basal diet; FML, basal diet +10% fermented mulberry leaves; T-AOC, total antioxidant capacity; MDA, malondialdehyde; T-SOD, total superoxide dismutase; GSH-Px, glutathione peroxidase.

**Table S4**

Effect of fermented mulberry leaves on fatty acid profile of *longissimus thoracis* in finishing pigs (% fatty acid).

| Items               | CON        | FML        | <i>P</i> -value |
|---------------------|------------|------------|-----------------|
| C10:0               | 0.16±0.01  | 0.15±0.00  | 0.292           |
| C11:0               | 4.18±0.79  | 4.34±0.79  | 0.893           |
| C12:0               | 0.13±0.02  | 0.11±0.00  | 0.334           |
| C14:0               | 1.53±0.03  | 1.60±0.05  | 0.226           |
| C15:0               | 0.03±0.01  | 0.04±0.00  | 0.053           |
| C16:0               | 26.00±0.45 | 25.94±0.30 | 0.921           |
| C17:0               | 0.16±0.01  | 0.20±0.01  | 0.004           |
| C18:0               | 13.19±0.54 | 11.76±0.55 | 0.093           |
| C20:0               | 0.22±0.01  | 0.21±0.01  | 0.412           |
| C22:0               | 0.05±0.01  | 0.05±0.02  | 0.944           |
| C14:1(cis-9)        | 0.02±0.00  | 0.04±0.01  | 0.073           |
| C16:1(cis-9)        | 3.26±0.13  | 3.76±0.22  | 0.080           |
| C18:1(trans-9)      | 0.17±0.04  | 0.14±0.01  | 0.467           |
| C18:1(cis-9)        | 41.23±1.06 | 40.61±0.76 | 0.645           |
| C20:1(cis-11)       | 0.83±0.05  | 0.86±0.04  | 0.670           |
| C22:1(cis-13)       | 0.08±0.01  | 0.07±0.01  | 0.722           |
| C18:2(all-cis-9,12) | 9.99±0.97  | 11.35±0.72 | 0.286           |

|                                |            |            |       |
|--------------------------------|------------|------------|-------|
| C18:3(all-cis-6,9,12)          | 0.05±0.00  | 0.05±0.01  | 0.670 |
| C18:3(all-cis-9,12,15)         | 0.44±0.03  | 0.59±0.05  | 0.045 |
| C20:2(all-cis-11,14)           | 0.37±0.03  | 0.42±0.02  | 0.280 |
| C20:3(all-cis-8,11,14)         | 0.22±0.03  | 0.23±0.02  | 0.932 |
| C20:4(all-cis-5,8,11,14)       | 1.77±0.27  | 1.76±0.25  | 0.986 |
| C20:3(all-cis-11,14,17)        | 0.06±0.01  | 0.08±0.01  | 0.085 |
| C20:5(all-cis-5,8,11,14,17)    | 0.07±0.01  | 0.08±0.01  | 0.954 |
| C22:6(all-cis-4,7,10,13,16,19) | 0.06±0.01  | 0.08±0.03  | 0.577 |
| Saturated fatty acid           | 45.61±0.98 | 44.36±1.25 | 0.449 |
| Mono unsaturated fatty acid    | 45.57±1.06 | 45.46±0.83 | 0.935 |
| Polyunsaturated fatty acid     | 12.99±1.31 | 14.60±0.99 | 0.350 |

CON, basal diet; FML, basal diet +10% fermented mulberry leaves,

**Table S5**

Alpha diversity analysis of gut and feces.

| Index    | Cecum     |           | Colon     |           | Feces     |           |
|----------|-----------|-----------|-----------|-----------|-----------|-----------|
|          | CON       | FML       | CON       | FML       | CON       | FML       |
| Chao     | 2150±110  | 1707±171  | 2354±66   | 2398±71   | 2644±59   | 2376±83*  |
| Richness | 1662±66   | 1284±011  | 1850±62   | 1844±54   | 2008±76   | 1846±63   |
| Shannon  | 7.47±0.15 | 6.29±0.64 | 7.81±0.14 | 7.69±0.10 | 7.57±0.18 | 7.67±0.05 |
| Simpson  | 0.02±0.02 | 0.09±0.05 | 0.02±0.01 | 0.02±0.01 | 0.02±0.00 | 0.02±0.00 |
| ACE      | 2212±117  | 1736±169* | 2412±75   | 2440±73   | 2717±58   | 2447±90*  |

CON, basal diet; FML, basal diet +10% fermented mulberry leaves.

\* indicates  $P < 0.05$ .

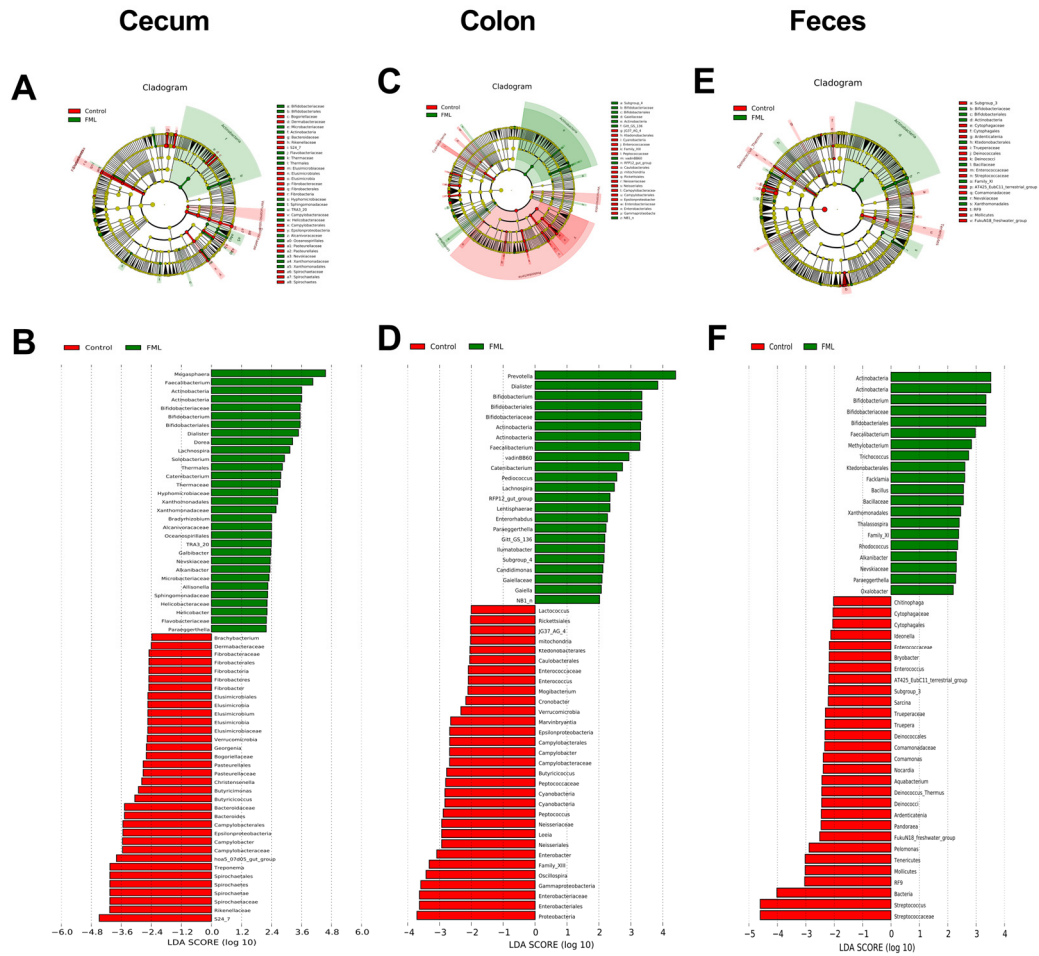

Figure S1. Linear discriminant analysis effect size (LEfSe) analysis ( $P < 0.05$ , LDA  $> 2.0$ ) of the gut and fecal microbiota. Control, basal diet; FML, basal diet +10% fermented mulberry leaves.

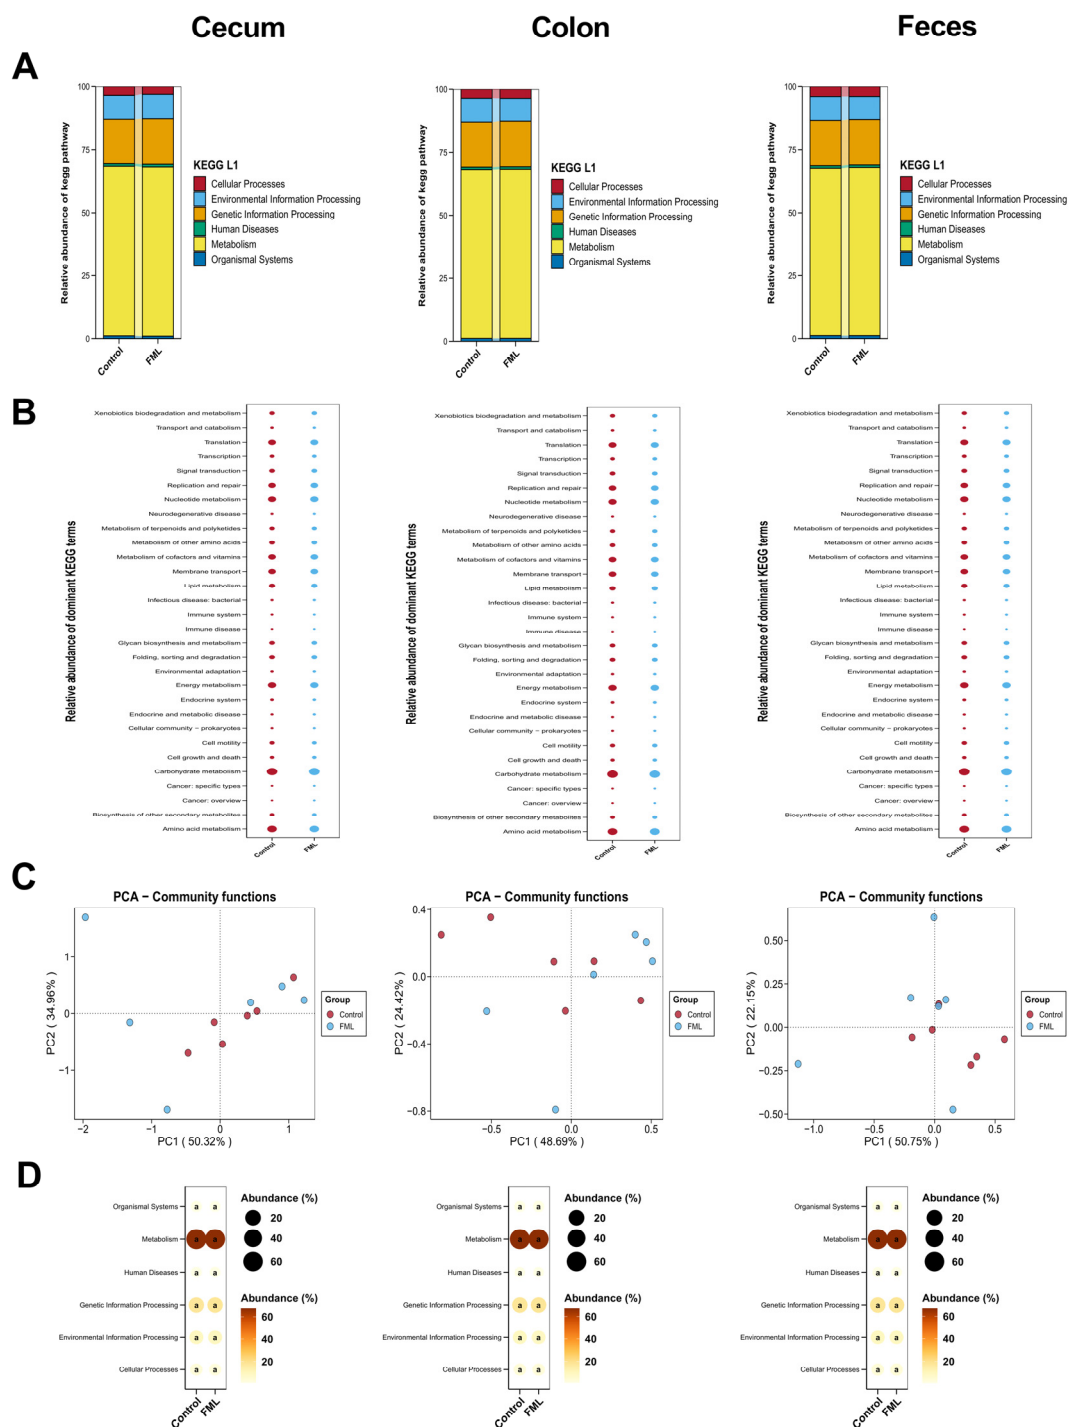

Figure S2. Prediction of the microbial community function in the gut and feces of finishing pigs.



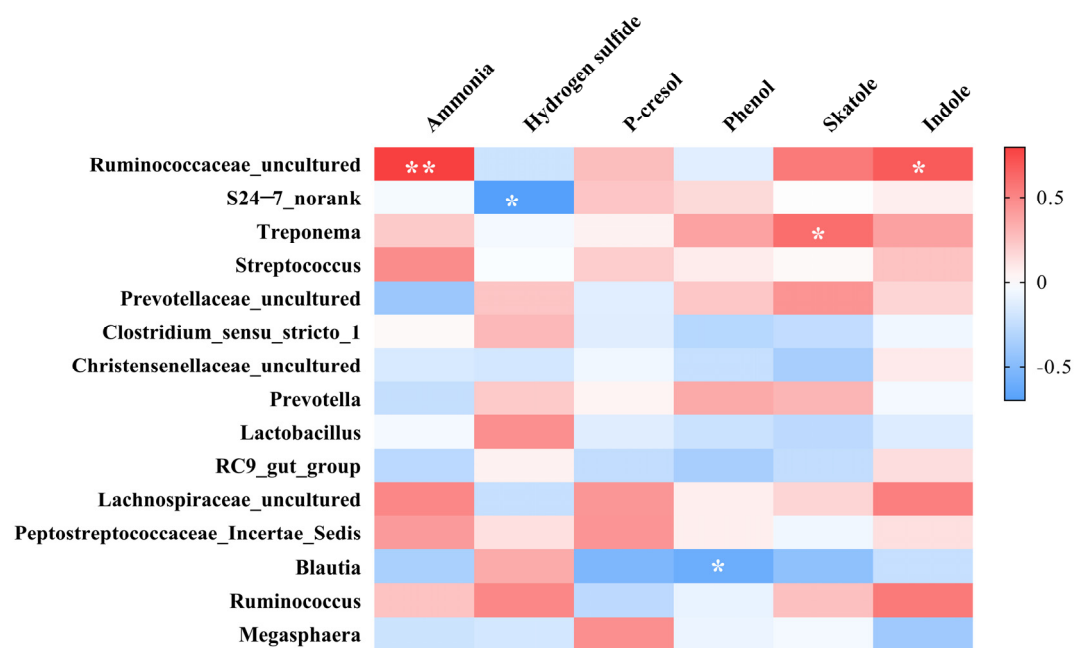

Figure S3. Spearman's correlation analysis between microorganisms and odorous compounds in the feces. \*  $P < 0.05$ ; \*\*  $P < 0.01$
